# Supplementary material for: Combinatorial recognition of clustered RNA elements by the multidomain RNA-binding protein IMP3
Source: Springer Nature journal article supplement (doi:10.1038/s41467-019-09769-8), 2019-05-22
Supplement: MOESM3 [file 41467_2019_9769_MOESM3_ESM.pdf › 41467_2019_9769_MOESM3_ESM.pdf]

## **Description of Additional Supplementary Files**

File Name: Supplementary Data 1

Description: SELEX-seq motif enrichment analysis

File Name: Supplementary Data 2

Description: 4-mer motif combinations used for spacing analysis

File Name: Supplementary Data 3

Description: List of oligonucleotides
